# Supplementary material
Source: publisher figshare collection journal article supplement (https://geolsoc.figshare.com/ndownloader/files/22791164)
Supplement: Supplementary file 1 [file 22791164]

## Sheet: Sheet1
Sample Name	CD017-1	Concepcion del Oro Monzonite
Mineral	Zrn
GSS Name	201-01			Concordant Scans: Ages
Preferred Age Summary
Analysis Name	Preferred Age (Ma)	2 -sigma	2 +sigma	Concordant Scans	206Pb/238U Age (Ma)	2 -sigma	2 +sigma	207Pb/206Pb Age (Ma)	2 -sigma	2 +sigma
2011AZ1_20	40.47	1.73	1.73	72	40.47	1.73	1.73	90.51	181.01	468.61
2011AZ1_19	40.81	1.66	1.66	106	40.81	1.66	1.66	106.17	212.35	385.14
2011AZ1_4	40.84	1.78	1.78	82	40.84	1.78	1.78	231.45	458.99	402.2
2011AZ1_10	41.11	1.89	1.89	90	41.11	1.89	1.89	212.45	424.91	399.54
2011AZ1_11	41.17	1.54	1.54	92	41.17	1.54	1.54	168.43	336.86	377.15
2011AZ1_14	41.22	2.02	2.02	62	41.22	2.02	2.02	167.24	334.49	485.42
2011AZ1_8	41.46	2.27	2.27	55	41.46	2.27	2.27	108.4	216.8	396.94
2011AZ1_5	41.5	1.64	1.65	95	41.5	1.64	1.65	138.15	276.29	399.86
2011AZ1_21	41.61	2.04	2.04	96	41.61	2.04	2.04	212.3	285.14	262.19
2011AZ1_2	41.74	1.92	1.92	87	41.74	1.92	1.92	300.99	452.16	396.73
2011AZ1_18	41.82	1.78	1.78	89	41.82	1.78	1.78	104.32	208.65	345.54
2011AZ1_9	42	1.9	1.89	78	42	1.9	1.89	284.53	491.01	426.37
2011AZ1_6	42.01	1.65	1.65	91	42.01	1.65	1.65	121.85	243.7	315.35
2011AZ1_26	42.01	1.96	1.96	85	42.01	1.96	1.96	359.25	660.99	548.42
2011AZ1_1	42.07	2.03	2.03	100	42.07	2.03	2.03	517.78	586.68	495.51
2011AZ1_30	42.14	2.02	2.02	71	42.14	2.02	2.02	301.68	454.11	398.22
2011AZ1_15	42.24	1.47	1.47	75	42.24	1.47	1.47	218.9	332.69	301.84
2011AZ1_3	42.31	1.81	1.82	93	42.31	1.81	1.82	171.98	343.96	323.2
2011AZ1_7	42.32	2.24	2.24	63	42.32	2.24	2.24	89.24	178.48	488.16
2011AZ1_23	42.46	2.06	2.06	72	42.46	2.06	2.06	122.41	244.82	391.28
2011AZ1_13	42.56	1.84	1.84	91	42.56	1.84	1.84	175.06	350.12	396.51
2011AZ1_24	42.6	1.59	1.59	70	42.6	1.59	1.59	236.78	418.99	371.15
2011AZ1_25	42.69	1.98	1.98	72	42.69	1.98	1.98	182.24	364.47	431.46
2011AZ1_27	42.71	1.68	1.67	80	42.71	1.68	1.67	226.2	323.25	294.04
2011AZ1_22	42.93	1.42	1.42	84	42.93	1.42	1.42	143.06	286.13	292.82
2011AZ1_29	42.93	1.5	1.5	90	42.93	1.5	1.5	186.08	294.84	270.4
2011AZ1_16	43.08	1.8	1.81	77	43.08	1.8	1.81	257.46	435.1	383.67
2011AZ1_28	43.19	1.63	1.63	87	43.19	1.63	1.63	262.98	352.82	318.22
2011AZ1_12	43.24	1.94	1.94	89	43.24	1.94	1.94	125.29	250.58	330.41
2011AZ1_17	43.33	1.52	1.52	86	43.33	1.52	1.52	134.21	268.43	313.86
Sample Name	PAN17-1	Panuelos laccolith monzonite
Mineral	Zrn
GSS Name	201-02			Concordant Scans: Ages
Preferred Age Summary
Analysis Name	Preferred Age (Ma)	2 -sigma	2 +sigma	Concordant Scans	206Pb/238U Age (Ma)	2 -sigma	2 +sigma	207Pb/206Pb Age (Ma)	2 -sigma	2 +sigma
2012AZ1_18	68.48	2.11	2.11	90	68.48	2.11	2.11	265.03	401.88	357.59
2012AZ1_10	68.97	3.07	3.07	93	68.97	3.07	3.07	281.6	502.64	435.13
2012AZ1_27	69.07	2.75	2.75	97	69.07	2.75	2.75	98.21	196.41	374.3
2012AZ1_28	69.09	4.61	4.61	58	69.09	4.61	4.61	102.49	204.99	361.34
2012AZ1_25	69.31	2.35	2.34	82	69.31	2.35	2.34	138.1	276.21	324.2
2012AZ1_15	69.51	2.69	2.69	82	69.51	2.69	2.69	151.21	302.43	353.71
2012AZ1_8	69.6	3.78	3.78	76	69.6	3.78	3.78	257.86	515.72	521.89
2012AZ1_24	69.68	2.67	2.67	80	69.68	2.67	2.67	180.62	361.24	390.82
2012AZ1_9	69.74	3.1	3.1	95	69.74	3.1	3.1	37.66	75.31	478.81
2012AZ1_14	69.76	2.44	2.44	66	69.76	2.44	2.44	188.74	294.06	269.74
2012AZ1_2	70.09	5.43	5.43	81	70.09	5.43	5.43	172.69	324.54	295.2
2012AZ1_22	70.11	2.68	2.68	98	70.11	2.68	2.68	170.18	260.19	240.99
2012AZ1_17	70.14	3.07	3.07	82	70.14	3.07	3.07	427.26	538.65	461.21
2012AZ1_29	70.15	5.17	5.17	80	70.15	5.17	5.17	223.78	447.56	495.95
2012AZ1_7	70.46	5.07	5.07	79	70.46	5.07	5.07	192.25	384.49	743.47
2012AZ1_20	70.57	2.23	2.23	94	70.57	2.23	2.23	242.97	308.28	281.57
2012AZ1_12	70.83	2.44	2.44	99	70.83	2.44	2.44	89.61	179.22	243.78
2012AZ1_11	70.85	2.73	2.73	89	70.85	2.73	2.73	225.87	281.37	258.98
2012AZ1_3	70.9	5.42	5.42	90	70.9	5.42	5.42	275.37	526.19	452.68
2012AZ1_5	71.05	5.38	5.38	82	71.05	5.38	5.38	237.44	474.87	475.32
2012AZ1_26	71.09	4.78	4.77	58	71.09	4.78	4.77	51.16	102.32	391.56
2012AZ1_4	71.32	5.88	5.88	74	71.32	5.88	5.88	170.83	341.45	311.4
2012AZ1_30	71.35	2.6	2.6	96	71.35	2.6	2.6	132.05	196.85	185.69
2012AZ1_23	71.6	2.77	2.77	102	71.6	2.77	2.77	115.36	230.72	379.89
2012AZ1_21	72.64	3.81	3.81	81	72.64	3.81	3.81	228.57	457.13	536.02
2012AZ1_19	73.61	5.29	5.29	83	73.61	5.29	5.29	344.02	549.9	469.81
2012AZ1_16	74.12	2.53	2.54	108	74.12	2.53	2.54	151.73	186.68	176.6
2012AZ1_13	214.41	6.5	6.5	108	214.41	6.5	6.5	331.82	155.72	148.57
Sample Name	MDA17-2	Andesite dike
Mineral	Zrn
GSS Name	201-03			Concordant Scans: Ages
Preferred Age Summary
Analysis Name	Preferred Age (Ma)	2 -sigma	2 +sigma	Concordant Scans	206Pb/238U Age (Ma)	2 -sigma	2 +sigma	207Pb/206Pb Age (Ma)	2 -sigma	2 +sigma
2013AZ1_13	74.9	4.42	4.42	90	74.9	4.42	4.42	116.14	232.28	244.37
2013AZ1_10	77.16	3.93	3.93	128	77.16	3.93	3.93	154.02	308.03	1213.49
2013AZ1_7	77.42	5.67	5.67	80	77.42	5.67	5.67	230.88	461.76	719.35
2013AZ1_2	77.52	5.92	5.92	89	77.52	5.92	5.92	194.36	312.16	284.89
2013AZ1_14	77.59	3.35	3.35	128	77.59	3.35	3.35	703.62	1199.5	867.79
2013AZ1_1	77.62	7.85	7.84	93	77.62	7.85	7.84	417.83	448.06	393.2
2013AZ1_30	77.65	3.93	3.93	61	77.65	3.93	3.93	154.59	277.08	255.44
2013AZ1_3	78.01	5.97	5.97	95	78.01	5.97	5.97	348.13	494.45	428.72
2013AZ1_24	78.14	7.4	7.39	90	78.14	7.4	7.39	355.74	234.04	218.21
2013AZ1_18	78.15	4.17	4.17	128	78.15	4.17	4.17	964.65	1574.91	1041.77
2013AZ1_22	78.33	3.88	3.88	128	78.33	3.88	3.88	242	483.99	1128.61
2013AZ1_4	78.49	6.49	6.49	78	78.49	6.49	6.49	199.93	337.76	306.05
2013AZ1_5	78.57	5.98	5.98	87	78.57	5.98	5.98	240.91	481.81	471.66
2013AZ1_12	78.6	3.04	3.04	128	78.6	3.04	3.04	137.24	274.48	677.8
2013AZ1_11	78.8	3.26	3.26	128	78.8	3.26	3.26	272.03	544.06	726.81
2013AZ1_15	79.03	4.36	4.36	128	79.03	4.36	4.36	985.93	1461.56	990.89
2013AZ1_20	79.45	4.5	4.5	128	79.45	4.5	4.5	962.14	1714.39	1100.52
2013AZ1_28	80.33	3.73	3.73	94	80.33	3.73	3.73	153.33	219.08	205.33
2013AZ1_6	80.68	6.88	6.88	79	80.68	6.88	6.88	144.28	271.21	250.45
2013AZ1_29	80.73	2.63	2.63	61	80.73	2.63	2.63	244.98	266.06	245.93
2013AZ1_26	81.01	6.77	6.77	102	81.01	6.77	6.77	224.5	219.16	205.33
2013AZ1_21	81.36	8.06	8.05	127	81.36	8.06	8.05	276.98	553.95	2495.31
2013AZ1_27	81.47	11.13	11.13	64	81.47	11.13	11.13	154.62	309.25	401.35
2013AZ1_17	81.78	7.3	7.3	128	81.78	7.3	7.3	1559.4	2169.71	1251.03
2013AZ1_23	82.58	8.78	8.78	89	82.58	8.78	8.78	158.58	282.54	260.06
2013AZ1_25	83.44	4.22	4.22	84	83.44	4.22	4.22	127.36	174.37	165.56
2013AZ1_16	83.49	3.36	3.36	128	83.49	3.36	3.36	495.17	715.39	584.38
2013AZ1_8	83.55	5.1	5.1	71	83.55	5.1	5.1	113.56	227.13	284.35
2013AZ1_9	83.74	2.78	2.78	126	83.74	2.78	2.78	348.24	244.08	226.92
2013AZ1_19	84.31	8.21	8.2	128	84.31	8.21	8.2	1355.69	2535.69	1368.73
Sample Name	CAN17-3	Greenschist metavolcanic block from thrust fault zone, encased in gypsum
Mineral	Zrn
GSS Name	201-06			Concordant Scans: Ages
Preferred Age Summary
Analysis Name	Preferred Age (Ma)	2 -sigma	2 +sigma	Concordant Scans	206Pb/238U Age (Ma)	2 -sigma	2 +sigma	207Pb/206Pb Age (Ma)	2 -sigma	2 +sigma
2016AZ1_14	28.66	1.78	1.78	86	28.66	1.78	1.78	140.72	281.44	672.72
2016AZ1_31	121.26	6.72	6.72	86	121.26	6.72	6.72	341.42	332.01	301.06
2016AZ1_29	124.67	6.31	6.3	104	124.67	6.31	6.3	208.81	415.34	368.36
2016AZ1_17	125.85	6.69	6.68	78	125.85	6.69	6.68	287.88	360.66	324.53
2016AZ1_12	126.02	6.02	6.01	79	126.02	6.02	6.01	227.88	309.17	282.34
2016AZ1_30	127.11	7.7	7.7	92	127.11	7.7	7.7	303.36	422.52	373.72
2016AZ1_11	128.23	5.62	5.62	97	128.23	5.62	5.62	262.19	339.57	307.41
2016AZ1_28	129.12	6.55	6.54	79	129.12	6.55	6.54	222.56	445.12	507.8
2016AZ1_39	129.36	9	8.99	86	129.36	9	8.99	310.48	463.11	405.1
2016AZ1_43	129.37	9.97	9.97	72	129.37	9.97	9.97	357.76	405.66	360.33
2016AZ1_15	129.68	6.97	6.96	85	129.68	6.97	6.96	277.66	496.76	430.73
2016AZ1_19	130.18	7.86	7.85	73	130.18	7.86	7.85	164.01	328.02	513.12
2016AZ1_41	130.68	8.96	8.96	99	130.68	8.96	8.96	307.15	354.26	319.3
2016AZ1_13	131.24	6.55	6.55	79	131.24	6.55	6.55	390.84	433.87	382.31
2016AZ1_33	133.01	7.24	7.24	85	133.01	7.24	7.24	286.47	333.4	302.3
2016AZ1_42	136.42	9.21	9.2	100	136.42	9.21	9.2	340.56	378.69	338.94
2016AZ1_10	136.67	6.69	6.68	96	136.67	6.69	6.68	313.33	445.3	391.4
2016AZ1_9	136.74	5.52	5.52	94	136.74	5.52	5.52	230.9	352.96	318.4
2016AZ1_37	137.51	10.78	10.77	72	137.51	10.78	10.77	281.21	507.59	438.83
2016AZ1_20	138.44	6.94	6.94	75	138.44	6.94	6.94	367.21	401.53	357.04
2016AZ1_24	138.53	5.57	5.57	108	138.53	5.57	5.57	217.65	223.84	209.45
2016AZ1_16	138.88	7.2	7.19	81	138.88	7.2	7.19	152.2	304.41	526.67
2016AZ1_27	139.01	7.48	7.47	88	139.01	7.48	7.47	439.86	432.64	381.21
2016AZ1_25	140.51	5.84	5.84	102	140.51	5.84	5.84	386.02	328.78	298.31
2016AZ1_45	140.67	10.94	10.93	73	140.67	10.94	10.93	320.01	423.83	374.7
2016AZ1_51	142.5	6.21	6.21	89	142.5	6.21	6.21	198.22	233.41	217.82
2016AZ1_3	142.65	8.74	8.74	90	142.65	8.74	8.74	607.98	467.78	407.66
2016AZ1_38	143.13	13.57	13.56	105	143.13	13.57	13.56	366.64	250.54	232.47
2016AZ1_22	143.54	7.1	7.1	86	143.54	7.1	7.1	403.43	289.6	265.68
2016AZ1_21	143.61	9.02	9.02	73	143.61	9.02	9.02	280.24	437.91	385.78
2016AZ1_2	143.8	10.52	10.51	82	143.8	10.52	10.51	383.7	443.12	389.49
2016AZ1_7	144.21	7.87	7.86	74	144.21	7.87	7.86	260.16	452.33	396.99
2016AZ1_46	144.26	10.17	10.16	97	144.26	10.17	10.16	259.68	519.36	472.15
2016AZ1_89	144.66	19.47	19.44	116	144.66	19.47	19.44	398.46	366.33	328.87
2016AZ1_44	144.99	8.93	8.92	116	144.99	8.93	8.92	239.92	220.69	206.66
2016AZ1_4	145.06	9.06	9.05	91	145.06	9.06	9.05	349.17	515.81	444.68
2016AZ1_35	145.3	7.83	7.82	79	145.3	7.83	7.82	304.68	314.38	286.54
2016AZ1_47	146.02	7.97	7.97	77	146.02	7.97	7.97	255.35	330.18	299.71
2016AZ1_8	146.15	8.64	8.64	86	146.15	8.64	8.64	251.68	503.36	451.1
2016AZ1_48	147.1	6.24	6.24	82	147.1	6.24	6.24	112.73	225.47	250.01
2016AZ1_5	147.52	9.24	9.24	75	147.52	9.24	9.24	304.15	608.3	516.49
2016AZ1_49	147.84	6.58	6.57	80	147.84	6.58	6.57	247.97	327.36	297.4
2016AZ1_26	148.03	6.84	6.83	86	148.03	6.84	6.83	331.29	327.72	297.54
2016AZ1_23	148.98	7.36	7.35	81	148.98	7.36	7.35	274.21	415.94	368.65
2016AZ1_6	149.33	7.11	7.1	94	149.33	7.11	7.1	275.1	428.54	378.51
2016AZ1_1	151.98	12.75	12.74	68	151.98	12.75	12.74	376.9	753.79	667.09
2016AZ1_108	154.35	6.61	6.6	91	154.35	6.61	6.6	230.91	268.13	247.71
2016AZ1_91	154.74	21.53	21.49	100	154.74	21.53	21.49	498.56	373.13	334.12
2016AZ1_96	154.78	14.01	13.99	95	154.78	14.01	13.99	324.56	352.69	317.99
2016AZ1_40	155.94	10.4	10.4	101	155.94	10.4	10.4	321.66	382.95	342.39
2016AZ1_107	156.86	6.02	6.02	99	156.86	6.02	6.02	243.41	249.02	231.3
2016AZ1_58	158.72	12.62	12.6	121	158.72	12.62	12.6	264.3	243.37	226.4
2016AZ1_110	159.64	6.8	6.8	89	159.64	6.8	6.8	227.77	281.43	259.02
2016AZ1_106	160.16	6.17	6.16	102	160.16	6.17	6.16	267.77	241.77	225.01
2016AZ1_50	160.5	5.99	5.99	99	160.5	5.99	5.99	177.99	161.53	153.92
2016AZ1_105	162.24	6.77	6.77	88	162.24	6.77	6.77	207.99	257.2	238.38
2016AZ1_93	163.84	20.18	20.15	115	163.84	20.18	20.15	279.06	346.37	312.93
2016AZ1_95	163.97	16.65	16.63	95	163.97	16.65	16.63	320.53	316.61	288.37
2016AZ1_92	166.1	21.62	21.59	106	166.1	21.62	21.59	272.08	365.05	328.12
2016AZ1_101	166.43	9.33	9.32	96	166.43	9.33	9.32	326.26	227.82	212.82
2016AZ1_97	167.94	13.29	13.28	122	167.94	13.29	13.28	352.7	233.16	217.45
2016AZ1_64	168.11	22.25	22.21	101	168.11	22.25	22.21	349	430.2	379.58
2016AZ1_60	168.67	16.45	16.42	97	168.67	16.45	16.42	393.86	348.98	314.83
2016AZ1_85	168.95	8.98	8.97	86	168.95	8.98	8.97	243.07	189.95	179.47
2016AZ1_59	169.51	15.31	15.29	95	169.51	15.31	15.29	301.25	365.9	328.74
2016AZ1_63	170.12	19.58	19.55	106	170.12	19.58	19.55	290.18	317.18	288.9
2016AZ1_86	170.13	7.65	7.65	101	170.13	7.65	7.65	389.84	520.24	447.81
2016AZ1_65	170.88	22.18	22.14	114	170.88	22.18	22.14	346.7	337.53	305.57
2016AZ1_103	171.16	9.48	9.48	89	171.16	9.48	9.48	301.7	262.16	242.53
2016AZ1_82	171.54	8.71	8.71	76	171.54	8.71	8.71	297	318.73	290.17
2016AZ1_90	172.1	13.44	13.43	89	172.1	13.44	13.43	253.18	281.36	258.93
2016AZ1_81	173.75	7.96	7.95	86	173.75	7.96	7.95	221.84	289.71	266.03
2016AZ1_88	173.87	17.27	17.25	112	173.87	17.27	17.25	293.77	267.54	247.13
2016AZ1_94	173.92	14.92	14.9	86	173.92	14.92	14.9	227.09	372.82	334.48
2016AZ1_84	174.5	10.51	10.5	96	174.5	10.51	10.5	421.38	326.15	296.08
2016AZ1_57	175.14	13.81	13.79	112	175.14	13.81	13.79	126.97	253.94	270.97
2016AZ1_98	175.61	13.09	13.07	100	175.61	13.09	13.07	297.91	293.3	268.94
2016AZ1_102	175.91	9.1	9.1	99	175.91	9.1	9.1	198.55	308.95	282.21
2016AZ1_87	177.16	8.31	8.3	95	177.16	8.31	8.3	362.92	329.65	299.07
2016AZ1_67	177.76	21.65	21.61	110	177.76	21.65	21.61	263.36	323.36	294.07
2016AZ1_56	177.9	18.1	18.07	97	177.9	18.1	18.07	252.18	325	295.44
2016AZ1_99	178.6	11.42	11.41	86	178.6	11.42	11.41	191.28	295.93	271.32
2016AZ1_83	178.64	10.05	10.05	96	178.64	10.05	10.05	303.63	326.25	296.38
2016AZ1_55	180.08	19.8	19.77	114	180.08	19.8	19.77	362.16	366.03	328.71
2016AZ1_52	181.51	13.02	13.01	103	181.51	13.02	13.01	428.34	285.05	261.81
2016AZ1_54	182.02	19.91	19.87	111	182.02	19.91	19.87	419.88	347.86	313.87
2016AZ1_53	183.07	17.13	17.11	102	183.07	17.13	17.11	276.03	328.19	298.02
2016AZ1_66	183.97	20.51	20.47	117	183.97	20.51	20.47	344.66	338.48	306.35
2016AZ1_36	184.67	10.55	10.54	105	184.67	10.55	10.54	262.18	206.07	193.77
2016AZ1_70	186.04	14.66	14.64	118	186.04	14.66	14.64	384.59	342.11	309.24
2016AZ1_76	186.09	11.8	11.79	81	186.09	11.8	11.79	364.8	324.17	294.55
2016AZ1_79	187.93	7.55	7.55	97	187.93	7.55	7.55	207.72	194.42	183.48
2016AZ1_69	188.01	27.25	27.2	101	188.01	27.25	27.2	360.83	353.64	318.68
2016AZ1_104	190.79	7.35	7.35	105	190.79	7.35	7.35	190.62	136.64	131.15
2016AZ1_78	191.06	7.83	7.83	99	191.06	7.83	7.83	369.21	242.1	225.19
2016AZ1_80	192.21	10.23	10.22	78	192.21	10.23	10.22	317.71	338.76	306.64
2016AZ1_68	192.88	24.94	24.89	119	192.88	24.94	24.89	288.88	400.43	356.38
2016AZ1_73	194.37	11.19	11.18	97	194.37	11.19	11.18	400.7	384.12	343.13
2016AZ1_74	194.78	8.32	8.31	92	194.78	8.32	8.31	308.7	370.37	332.32
2016AZ1_72	195.44	22.61	22.57	109	195.44	22.61	22.57	326.36	352.72	318.01
2016AZ1_77	195.84	10.54	10.53	89	195.84	10.54	10.53	204.03	279.47	257.4
2016AZ1_75	196.93	9.19	9.18	78	196.93	9.19	9.18	223.57	304.67	278.59
2016AZ1_71	212.08	17.42	17.39	116	212.08	17.42	17.39	219.33	225.49	210.88
2016AZ1_62	222.41	26.81	26.75	102	222.41	26.81	26.75	414.85	334.68	303.11
2016AZ1_100	272.25	11.6	11.59	115	272.25	11.6	11.59	279.63	96.25	93.47
2016AZ1_61	376.64	36.72	36.62	122	376.64	36.72	36.62	686.92	220.7	206.29
2016AZ1_32	779.68	31.7	31.62	95	779.68	31.7	31.62	1007.92	134.92	129.29
2016AZ1_109	1093.35	39.75	39.63	121	1093.35	39.75	39.63	1227.57	101.16	97.92
2016AZ1_18	1330.3	89.13	88.51	77	1330.3	89.13	88.51	1508.99	94.48	91.61
2016AZ1_34	1509.78	127.55	126.3	54	1509.78	127.55	126.3	1131.71	139.99	133.9
Sample Name	Sant17-1	K-Pg breccia
Mineral	Zrn
GSS Name	201-20			Concordant Scans: Ages
Preferred Age Summary
Analysis Name	Preferred Age (Ma)	2 -sigma	2 +sigma	Concordant Scans	206Pb/238U Age (Ma)	2 -sigma	2 +sigma	207Pb/206Pb Age (Ma)	2 -sigma	2 +sigma
20120AZ1_8	65.16	1.56	1.56	69	65.16	1.56	1.56	95.84	116.33	112.35
20120AZ1_63	70.5	2.35	2.35	53	70.5	2.35	2.35	165.32	330.65	332.11
20120AZ1_83	72.34	2.04	2.04	78	72.34	2.04	2.04	238.77	241.96	225.2
20120AZ1_57	72.5	4.72	4.72	76	72.5	4.72	4.72	205.68	254.4	235.98
20120AZ1_90	79.13	3.46	3.46	55	79.13	3.46	3.46	270.64	381.93	341.69
20120AZ1_31	90.2	5.82	5.82	90	90.2	5.82	5.82	145.23	220.17	206.29
20120AZ1_3	94.08	3.1	3.1	45	94.08	3.1	3.1	182.96	254.91	236.44
20120AZ1_22	98.14	14.47	14.46	4	98.14	14.47	14.46	383.21	562.74	478.95
20120AZ1_19	101.39	3.03	3.03	80	101.39	3.03	3.03	209.75	130.71	125.67
20120AZ1_82	102.71	2.17	2.17	78	102.71	2.17	2.17	124.03	84.9	82.76
20120AZ1_51	103.6	2.35	2.35	67	103.6	2.35	2.35	158.58	111.47	107.8
20120AZ1_49	108.95	2.47	2.47	74	108.95	2.47	2.47	194.52	170.24	161.79
20120AZ1_105	114.92	2.58	2.58	81	114.92	2.58	2.58	133.11	95.93	93.2
20120AZ1_36	121.13	10.61	10.6	90	121.13	10.61	10.6	243.51	238.78	222.44
20120AZ1_37	144.39	6.76	6.76	59	144.39	6.76	6.76	189.95	234.12	218.44
20120AZ1_60	235.28	3.82	3.82	81	235.28	3.82	3.82	263.48	109.37	105.81
20120AZ1_97	238.17	6.98	6.97	30	238.17	6.98	6.97	381.99	184.19	174.23
20120AZ1_53	248.19	3.89	3.89	90	248.19	3.89	3.89	247.47	72.6	71.01
20120AZ1_94	265.81	12.51	12.5	59	265.81	12.51	12.5	400.03	689.55	567.66
20120AZ1_43	267.67	5.24	5.23	93	267.67	5.24	5.23	276.4	86.61	84.36
20120AZ1_75	270.25	7.77	7.77	64	270.25	7.77	7.77	365.88	212.2	199.1
20120AZ1_100	271.65	18.12	18.1	118	271.65	18.12	18.1	338	161.15	153.5
20120AZ1_66	274.7	4.47	4.47	104	274.7	4.47	4.47	278.4	98.2	95.32
20120AZ1_109	276.8	4.92	4.92	85	276.8	4.92	4.92	302.82	100.24	97.23
20120AZ1_48	310.24	6.76	6.76	88	310.24	6.76	6.76	335.64	90.54	88.07
20120AZ1_44	310.68	14.94	14.92	68	310.68	14.94	14.92	710.92	455.03	397.62
20120AZ1_58	428.04	6.58	6.58	95	428.04	6.58	6.58	432.42	89.94	87.49
20120AZ1_104	500.41	18.54	18.51	102	500.41	18.54	18.51	546.8	125.65	120.89
20120AZ1_74	598.13	12.28	12.27	96	598.13	12.28	12.27	616.23	79.85	77.89
20120AZ1_93	637.91	16	15.97	114	637.91	16	15.97	639.26	68.18	66.75
20120AZ1_92	668.86	20.54	20.51	107	668.86	20.54	20.51	732	92.08	89.46
20120AZ1_80	676.33	28.28	28.22	48	676.33	28.28	28.22	819.3	115.67	111.55
20120AZ1_5	689.65	13.7	13.69	97	689.65	13.7	13.69	746.57	66.38	65.01
20120AZ1_11	711.66	36.58	36.47	22	711.66	36.58	36.47	880.92	354.28	318.16
20120AZ1_23	785.12	25.53	25.48	12	785.12	25.53	25.48	913.25	108.05	104.43
20120AZ1_12	831.81	16.89	16.87	77	831.81	16.89	16.87	908.51	55.82	54.84
20120AZ1_25	841.71	23.32	23.28	87	841.71	23.32	23.28	911.84	83.43	81.25
20120AZ1_59	881.22	11.88	11.87	95	881.22	11.88	11.87	927.69	51.01	50.18
20120AZ1_69	896.99	21.31	21.28	104	896.99	21.31	21.28	931.48	145.66	139.15
20120AZ1_42	899.5	17	16.98	81	899.5	17	16.98	890.08	103.24	99.93
20120AZ1_32	908.4	49.1	48.91	122	908.4	49.1	48.91	921.87	113.57	109.58
20120AZ1_65	921.83	13.37	13.35	106	921.83	13.37	13.35	930.85	46.85	46.16
20120AZ1_70	935	25.9	25.85	47	935	25.9	25.85	1018.69	58.68	57.59
20120AZ1_110	942.73	15.58	15.56	111	942.73	15.58	15.56	951	52.03	51.18
20120AZ1_108	944.72	14.75	14.74	90	944.72	14.75	14.74	986.29	62.75	61.5
20120AZ1_85	947.8	16.97	16.95	109	947.8	16.97	16.95	965.96	48.87	48.11
20120AZ1_15	951.48	15.11	15.1	115	951.48	15.11	15.1	950.81	39.26	38.77
20120AZ1_26	952.71	18.84	18.81	118	952.71	18.84	18.81	949.87	64.49	63.18
20120AZ1_81	958.66	14.81	14.79	104	958.66	14.81	14.79	976.84	47.44	46.73
20120AZ1_89	965.03	13.6	13.59	96	965.03	13.6	13.59	998.65	47.28	46.57
20120AZ1_78	967.74	20.57	20.53	108	967.74	20.57	20.53	1004.32	44.11	43.49
20120AZ1_96	971.06	15.41	15.39	102	971.06	15.41	15.39	989.34	61.45	60.26
20120AZ1_39	973.59	16.9	16.88	109	973.59	16.9	16.88	977.66	45.99	45.32
20120AZ1_9	989.5	15.27	15.26	100	989.5	15.27	15.26	982.77	51.82	50.97
20120AZ1_33	992.98	57.23	56.98	119	992.98	57.23	56.98	949.88	141.38	135.23
20120AZ1_24	997.6	22.89	22.85	113	997.6	22.89	22.85	998.17	59.36	58.25
20120AZ1_107	1002.88	18.01	17.99	115	1002.88	18.01	17.99	1041.2	36.37	35.95
20120AZ1_35	1009.08	74.74	74.31	117	1009.08	74.74	74.31	1081.98	159.77	151.91
20120AZ1_99	1013.02	45.62	45.45	125	1013.02	45.62	45.45	1041.08	102.77	99.46
20120AZ1_38	1016.05	17.68	17.65	115	1016.05	17.68	17.65	1055.05	48.83	48.07
20120AZ1_86	1018.23	31.05	30.97	119	1018.23	31.05	30.97	1126.55	66.78	65.37
20120AZ1_102	1020.42	18.39	18.36	110	1020.42	18.39	18.36	1066.71	58.32	57.24
20120AZ1_71	1021.76	18.07	18.04	108	1021.76	18.07	18.04	1038.51	53.2	52.3
20120AZ1_98	1037.1	16.39	16.37	110	1037.1	16.39	16.37	1095.37	44.1	43.48
20120AZ1_6	1052.59	17.54	17.52	91	1052.59	17.54	17.52	1067.79	60.29	59.14
20120AZ1_72	1054.46	16.99	16.97	107	1054.46	16.99	16.97	1070.35	54.09	53.16
20120AZ1_1	1066.43	18.43	18.4	113	1066.43	18.43	18.4	1077.27	49.71	48.92
20120AZ1_29	1067.7	16.44	16.42	75	1067.7	16.44	16.42	1134.7	45.81	45.14
20120AZ1_40	1067.75	16.02	16	96	1067.75	16.02	16	1090.69	47.05	46.34
20120AZ1_79	1070.27	20.12	20.09	98	1070.27	20.12	20.09	1087.46	47.54	46.82
20120AZ1_95	1077.26	16.05	16.03	111	1077.26	16.05	16.03	1100.56	43.72	43.11
20120AZ1_76	1079.89	17.58	17.55	115	1079.89	17.58	17.55	1101.56	48.96	48.2
20120AZ1_7	1086.85	15.84	15.83	101	1086.85	15.84	15.83	1130.77	45	44.35
20120AZ1_91	1090.68	14.91	14.89	95	1090.68	14.91	14.89	1105.33	52.52	51.64
20120AZ1_88	1095.08	16.09	16.07	92	1095.08	16.09	16.07	1089.05	57.9	56.83
20120AZ1_13	1100.92	15.35	15.34	95	1100.92	15.35	15.34	1132.82	42.97	42.38
20120AZ1_55	1101.37	66.71	66.36	122	1101.37	66.71	66.36	1167.58	128.78	123.59
20120AZ1_46	1106.51	16.84	16.82	102	1106.51	16.84	16.82	1129.37	45.05	44.4
20120AZ1_106	1107.43	15.78	15.76	98	1107.43	15.78	15.76	1126.22	49.27	48.5
20120AZ1_87	1110.38	32.99	32.91	123	1110.38	32.99	32.91	1125.28	80.72	78.66
20120AZ1_67	1113.35	33.63	33.54	122	1113.35	33.63	33.54	1120.43	81.66	79.55
20120AZ1_61	1117.46	28.4	28.34	120	1117.46	28.4	28.34	1181.7	65.23	63.87
20120AZ1_64	1126.32	14.9	14.88	110	1126.32	14.9	14.88	1133.54	43.73	43.12
20120AZ1_45	1145.5	17.75	17.73	102	1145.5	17.75	17.73	1203.13	46.12	45.44
20120AZ1_56	1150	87.3	86.71	124	1150	87.3	86.71	1101.65	178.47	168.7
20120AZ1_34	1150.89	79.85	79.36	117	1150.89	79.85	79.36	1163.68	154.38	146.99
20120AZ1_50	1165.45	20.25	20.22	117	1165.45	20.25	20.22	1193.03	45.17	44.51
20120AZ1_18	1172.17	60.84	60.55	116	1172.17	60.84	60.55	1204.81	119.29	114.82
20120AZ1_14	1179.77	16.74	16.71	99	1179.77	16.74	16.71	1180.08	58.28	57.19
20120AZ1_54	1180.68	21.62	21.58	111	1180.68	21.62	21.58	1176.63	55.43	54.45
20120AZ1_16	1192.67	15.45	15.44	108	1192.67	15.45	15.44	1187.44	50.98	50.14
20120AZ1_30	1196.58	18.74	18.71	116	1196.58	18.74	18.71	1199.66	44.15	43.52
20120AZ1_103	1198.96	18.59	18.56	105	1198.96	18.59	18.56	1218	47.19	46.48
20120AZ1_52	1202.44	22.82	22.78	114	1202.44	22.82	22.78	1212.34	45.03	44.37
20120AZ1_41	1203.89	16.85	16.83	86	1203.89	16.85	16.83	1224.72	41	40.45
20120AZ1_27	1242.1	38.77	38.65	123	1242.1	38.77	38.65	1258.79	65.25	63.89
20120AZ1_84	1285.55	19.58	19.55	92	1285.55	19.58	19.55	1348.48	41.7	41.13
20120AZ1_10	1313.38	28.75	28.68	82	1313.38	28.75	28.68	1205.12	64.98	63.63
20120AZ1_20	1316	24.21	24.16	116	1316	24.21	24.16	1315.59	47.32	46.6
20120AZ1_17	1363.02	21.68	21.65	66	1363.02	21.68	21.65	1441	40.15	39.62
20120AZ1_77	1511.86	45.07	44.41	113	1502.35	29.14	29.07	1511.86	45.07	44.41
20120AZ1_4	1755.38	149.73	142.57	9	1515.33	84	83.46	1755.38	149.73	142.57
20120AZ1_68	1870.96	40.12	39.59	107	1867.15	29.43	29.37	1870.96	40.12	39.59
20120AZ1_62	1985.85	83.96	81.63	107	1794.56	72.13	71.73	1985.85	83.96	81.63
20120AZ1_73	2058.8	41.86	41.27	104	2036.18	32.78	32.69	2058.8	41.86	41.27
20120AZ1_101	2589.71	63.35	61.98	34	2440.95	80.35	79.85	2589.71	63.35	61.98
Sample Name	ALTO17-2	Red tuff (Nazas?)
Mineral	Zrn
GSS Name	201-26			Concordant Scans: Ages
Preferred Age Summary
Analysis Name	Preferred Age (Ma)	2 -sigma	2 +sigma	Concordant Scans	206Pb/238U Age (Ma)	2 -sigma	2 +sigma	207Pb/206Pb Age (Ma)	2 -sigma	2 +sigma
20126AZ1_21	159.53	3.13	3.13	86	159.53	3.13	3.13	209.3	206.57	194.25
20126AZ1_50	163.07	3.69	3.69	66	163.07	3.69	3.69	171.29	126.08	121.4
20126AZ1_8	163.19	3.41	3.4	79	163.19	3.41	3.4	223.65	150.81	144.13
20126AZ1_27	163.74	3.26	3.26	81	163.74	3.26	3.26	228.94	229.28	214.19
20126AZ1_5	163.76	2.98	2.98	91	163.76	2.98	2.98	240.84	130.53	125.5
20126AZ1_98	163.89	10.84	10.83	90	163.89	10.84	10.83	250.21	188.5	178.16
20126AZ1_52	163.9	4.58	4.58	64	163.9	4.58	4.58	260.24	209.2	196.54
20126AZ1_7	163.97	3.75	3.75	70	163.97	3.75	3.75	207.05	136.39	130.91
20126AZ1_49	164.12	3.39	3.39	83	164.12	3.39	3.39	225.68	156.02	148.89
20126AZ1_88	164.13	16.2	16.18	68	164.13	16.2	16.18	268.32	522.28	449.82
20126AZ1_3	164.23	4.43	4.43	66	164.23	4.43	4.43	322.1	223.19	208.78
20126AZ1_12	164.39	3.7	3.7	89	164.39	3.7	3.7	231.47	175.44	166.46
20126AZ1_14	164.42	3.61	3.61	76	164.42	3.61	3.61	194.66	169.48	161.1
20126AZ1_30	164.58	4.38	4.38	62	164.58	4.38	4.38	273.04	233.37	217.71
20126AZ1_103	165.15	10.08	10.08	93	165.15	10.08	10.08	292.03	273.55	252.25
20126AZ1_32	165.46	4.76	4.76	61	165.46	4.76	4.76	222.18	247.21	229.76
20126AZ1_53	165.54	3.49	3.49	80	165.54	3.49	3.49	261.7	143.88	137.77
20126AZ1_13	165.6	3.46	3.46	75	165.6	3.46	3.46	213.13	110.92	107.27
20126AZ1_19	165.63	3.2	3.2	83	165.63	3.2	3.2	246.83	142.8	136.79
20126AZ1_61	165.63	3.36	3.36	86	165.63	3.36	3.36	211.5	176.14	167.1
20126AZ1_41	165.68	3.38	3.38	82	165.68	3.38	3.38	166.29	149.65	143.1
20126AZ1_54	165.81	3.28	3.28	69	165.81	3.28	3.28	170.86	152.99	146.15
20126AZ1_4	166.01	3.65	3.65	85	166.01	3.65	3.65	198.37	143.51	137.46
20126AZ1_6	166.16	3.46	3.46	85	166.16	3.46	3.46	225.23	158.8	151.41
20126AZ1_15	166.21	3.63	3.63	68	166.21	3.63	3.63	191.4	157.83	150.55
20126AZ1_79	166.21	3.31	3.31	101	166.21	3.31	3.31	213.91	90.37	87.93
20126AZ1_56	166.22	3.15	3.14	79	166.22	3.15	3.14	171.51	124.91	120.31
20126AZ1_72	166.25	3.36	3.36	63	166.25	3.36	3.36	163.96	128.76	123.88
20126AZ1_48	166.26	3.81	3.81	82	166.26	3.81	3.81	264.86	191.3	180.66
20126AZ1_46	166.27	3.18	3.17	88	166.27	3.18	3.17	189.92	110.54	106.92
20126AZ1_26	166.39	3.13	3.13	92	166.39	3.13	3.13	209.15	123.3	118.81
20126AZ1_62	166.46	3.81	3.81	81	166.46	3.81	3.81	194.93	146.92	140.59
20126AZ1_9	166.62	4.51	4.51	62	166.62	4.51	4.51	160.09	260.88	241.6
20126AZ1_29	166.7	3.6	3.59	65	166.7	3.6	3.59	224.83	136.55	131.06
20126AZ1_25	166.71	3.33	3.33	83	166.71	3.33	3.33	234.77	201.42	189.67
20126AZ1_77	166.85	4.07	4.07	79	166.85	4.07	4.07	193.22	172.71	164.03
20126AZ1_57	166.88	2.81	2.8	98	166.88	2.81	2.8	152.59	112.76	109
20126AZ1_101	166.95	10.1	10.09	109	166.95	10.1	10.09	147.01	153.8	146.89
20126AZ1_24	167.02	3.68	3.68	78	167.02	3.68	3.68	172.29	169.14	160.81
20126AZ1_63	167.06	3.59	3.59	72	167.06	3.59	3.59	200.69	103.79	100.59
20126AZ1_37	167.08	4.38	4.38	81	167.08	4.38	4.38	178.03	170.46	162.01
20126AZ1_38	167.22	3.77	3.77	83	167.22	3.77	3.77	264.76	191.27	180.62
20126AZ1_20	167.22	4.15	4.15	73	167.22	4.15	4.15	187.64	238.26	222.05
20126AZ1_34	167.33	3.31	3.31	75	167.33	3.31	3.31	186.99	170.76	162.27
20126AZ1_33	167.33	3.34	3.34	79	167.33	3.34	3.34	211.32	105.75	102.42
20126AZ1_68	167.35	5.32	5.32	51	167.35	5.32	5.32	304.44	273.19	251.93
20126AZ1_106	167.36	14.55	14.53	91	167.36	14.55	14.53	188.65	377.29	350.01
20126AZ1_1	167.42	5.48	5.48	69	167.42	5.48	5.48	402.01	384.64	343.54
20126AZ1_109	167.44	14.54	14.52	88	167.44	14.54	14.52	275.78	196.42	185.21
20126AZ1_43	167.45	3.85	3.85	69	167.45	3.85	3.85	274.01	175.08	166.11
20126AZ1_17	167.45	3.67	3.67	71	167.45	3.67	3.67	183.36	151.64	144.91
20126AZ1_47	167.46	3.71	3.71	63	167.46	3.71	3.71	179.82	130.51	125.49
20126AZ1_59	167.46	3.61	3.61	84	167.46	3.61	3.61	211.67	162.11	154.42
20126AZ1_55	167.6	3.81	3.81	60	167.6	3.81	3.81	220.16	167	158.86
20126AZ1_71	167.8	3.25	3.25	83	167.8	3.25	3.25	180.52	122.33	117.91
20126AZ1_2	167.84	4.42	4.42	66	167.84	4.42	4.42	165.16	144.26	138.16
20126AZ1_64	167.87	6.96	6.96	78	167.87	6.96	6.96	394.75	552.67	471.59
20126AZ1_39	167.88	3.56	3.55	65	167.88	3.56	3.55	189.9	163.17	155.4
20126AZ1_75	167.91	3.88	3.88	94	167.91	3.88	3.88	203.07	101.86	98.78
20126AZ1_16	167.91	3.87	3.87	60	167.91	3.87	3.87	216.25	150.06	143.45
20126AZ1_18	168	4.75	4.74	66	168	4.75	4.74	284.46	286.14	262.93
20126AZ1_78	168.01	3.43	3.43	85	168.01	3.43	3.43	238.23	128.65	123.76
20126AZ1_105	168.07	12.3	12.29	95	168.07	12.3	12.29	245.96	207.45	195.01
20126AZ1_10	168.21	3.48	3.48	80	168.21	3.48	3.48	251.21	158.71	151.32
20126AZ1_40	168.21	3.46	3.46	70	168.21	3.46	3.46	218.92	157.13	149.89
20126AZ1_22	168.26	4.09	4.09	69	168.26	4.09	4.09	193.9	161.9	154.25
20126AZ1_66	168.27	3.78	3.78	80	168.27	3.78	3.78	165.18	117.32	113.25
20126AZ1_44	168.35	3.43	3.43	87	168.35	3.43	3.43	233.6	114.26	110.38
20126AZ1_45	168.37	3.9	3.9	59	168.37	3.9	3.9	207.52	180.32	170.87
20126AZ1_60	168.62	3.64	3.64	68	168.62	3.64	3.64	156.98	140.68	134.88
20126AZ1_107	168.71	11.4	11.39	113	168.71	11.4	11.39	189.84	200.51	188.9
20126AZ1_58	169	4.78	4.78	69	169	4.78	4.78	315.96	295.91	271.11
20126AZ1_83	169.42	10.73	10.72	73	169.42	10.73	10.72	249.47	243.16	226.23
20126AZ1_69	169.69	3.19	3.19	70	169.69	3.19	3.19	201.77	98.84	95.94
20126AZ1_102	169.81	10.91	10.9	79	169.81	10.91	10.9	253.32	295.64	270.98
20126AZ1_67	169.94	4.29	4.29	82	169.94	4.29	4.29	195.45	137.47	131.91
20126AZ1_73	170.01	3.22	3.23	84	170.01	3.22	3.23	192.29	133.5	128.25
20126AZ1_91	170.06	10.04	10.03	88	170.06	10.04	10.03	366.3	189.46	178.95
20126AZ1_23	170.06	4.61	4.61	58	170.06	4.61	4.61	236.1	212.36	199.34
20126AZ1_87	170.33	10.43	10.42	106	170.33	10.43	10.42	226.98	178.28	169.02
20126AZ1_36	170.39	3.96	3.96	71	170.39	3.96	3.96	199.15	154.47	147.48
20126AZ1_82	170.5	4.61	4.6	88	170.5	4.61	4.6	201.99	122.12	117.71
20126AZ1_74	170.53	4.02	4.02	70	170.53	4.02	4.02	178.02	119.36	115.15
20126AZ1_35	170.6	4.05	4.05	86	170.6	4.05	4.05	244.92	153.53	146.61
20126AZ1_99	170.72	10.38	10.37	98	170.72	10.38	10.37	239.65	191.24	180.62
20126AZ1_80	171.09	4.1	4.1	90	171.09	4.1	4.1	191.98	215.77	202.39
20126AZ1_95	171.16	6.25	6.25	91	171.16	6.25	6.25	261.28	150.99	144.28
20126AZ1_51	171.46	3.51	3.51	71	171.46	3.51	3.51	313.27	139.59	133.82
20126AZ1_76	171.93	3.93	3.93	85	171.93	3.93	3.93	220.12	116.26	112.25
20126AZ1_65	172.06	3.76	3.76	81	172.06	3.76	3.76	221.87	165.96	157.91
20126AZ1_90	172.32	9.23	9.23	63	172.32	9.23	9.23	176.64	199.77	188.26
20126AZ1_81	172.53	3.65	3.65	93	172.53	3.65	3.65	202.33	109.31	105.76
20126AZ1_96	172.74	11.9	11.89	96	172.74	11.9	11.89	217.45	210.07	197.34
20126AZ1_28	173.46	8.27	8.27	73	173.46	8.27	8.27	513.01	696.32	571.48
20126AZ1_70	173.84	5.04	5.03	29	173.84	5.04	5.03	253.3	145.85	139.58
20126AZ1_108	174.11	12.57	12.55	108	174.11	12.57	12.55	209.77	182.39	172.72
20126AZ1_100	174.22	10.64	10.63	96	174.22	10.64	10.63	271.27	172.54	163.83
20126AZ1_104	175.28	13.72	13.7	114	175.28	13.72	13.7	253.44	196.27	185.09
20126AZ1_85	175.71	7.1	7.1	73	175.71	7.1	7.1	242.27	202.23	190.39
20126AZ1_92	176.36	8.69	8.68	89	176.36	8.69	8.68	174.78	149.6	143.05
20126AZ1_97	177.5	13.45	13.43	82	177.5	13.45	13.43	259.03	268.52	248.01
20126AZ1_89	177.57	9.64	9.63	98	177.57	9.64	9.63	214.65	151.39	144.66
20126AZ1_93	178.47	9.5	9.5	81	178.47	9.5	9.5	230.08	368.71	331.16
20126AZ1_84	181.63	13.32	13.31	69	181.63	13.32	13.31	414.7	214.27	200.87
20126AZ1_11	254.28	4.8	4.8	91	254.28	4.8	4.8	280.24	142.82	136.79
20126AZ1_42	267.31	6.37	6.36	80	267.31	6.37	6.36	313.54	240.2	223.6
20126AZ1_110	323.9	25.55	25.5	88	323.9	25.55	25.5	345.12	214.27	200.94
20126AZ1_94	749.6	24.45	24.41	119	749.6	24.45	24.41	691.67	139.85	133.92
20126AZ1_86	1642.69	96.41	93.4	120	1574.19	65.55	65.22	1642.69	96.41	93.4
20126AZ1_31	2507.47	36.94	36.47	87	2399.11	33.15	33.06	2507.47	36.94	36.47
Sample Name	ROC18-1	Rocamontes intrusion
Mineral	Zrn							207/235		206/238		207/206		Best age
Grain #	[U] ppm	U/Th	207/235	2σ error	206/238	2σ error	RHO	Age Ma	2σ error	Age (Ma)	2σ error	Age (Ma)	2σ error	(Ma)	2σ error	% Discordance*	Rim/Core
ROC18_1.FIN2	496	0.915	0.1962	0.0035	0.02814	0.00024	0.36052	181.7	3	178.9	1.5	222	37	178.9	1.5	1.5
ROC18_2.FIN2	456	1.85	0.1857	0.004	0.02655	0.00038	0.61919	172.8	3.4	168.9	2.4	224	38	168.9	2.4	2.3
ROC18_3.FIN2	19.29	0.07304	2.725	0.07	0.0351	0.00087	0.33662	1331	19	222.3	5.4	4414	45	DISC	DISC	83.3
ROC18_4.FIN2	432	1.97	0.0795	0.006	0.01158	0.00066	0.7638	77.6	5.6	74.2	4.2	173	99	74.2	4.2	4.4	Rim
ROC18_4.FIN2	942	2.71	0.1607	0.0044	0.02357	0.00046	0.62372	151.2	3.8	150.2	2.9	149	48	150.2	2.9	0.7	Core
ROC18_5.FIN2	260	1.043	0.1977	0.0042	0.02851	0.00026	0.22264	183	3.6	181.2	1.6	196	45	181.2	1.6	1
ROC18_6.FIN2	188.7	1.169	0.0798	0.0041	0.01191	0.00027	0.0023482	77.8	3.8	76.3	1.7	160	120	76.3	1.7	1.9	Rim
ROC18_6.FIN2	869	3.26	0.1864	0.0055	0.02692	0.00062	0.79012	173.4	4.7	171.2	3.9	198	42	171.2	3.9	1.3	Core
ROC18_7.FIN2	450	1.237	0.0816	0.0023	0.01198	0.00013	0.20059	79.5	2.2	76.74	0.85	165	58	76.7	0.9	3.5
ROC18_8.FIN2	465	2	0.0794	0.0043	0.01197	0.00031	0.42436	77.5	4	76.7	2	102	94	76.7	2	1	Rim
ROC18_8.FIN2	62.8	1.022	0.192	0.021	0.02592	0.00098	0.20399	177	18	164.9	6.1	370	230	164.9	6.1	6.8	Core
ROC18_9.FIN2	635	1.46	0.1052	0.0078	0.01579	0.00093	0.81027	101.5	7.2	101	5.9	120	100	101	5.9	0.5	Rim
ROC18_9.FIN2	163.6	1.022	0.1881	0.0068	0.02661	0.00042	0.36871	174.7	5.8	169.3	2.6	231	74	169.3	2.6	3.1	Core
ROC18_10.FIN2	33.1	0.1211	0.54	0.02	0.01617	0.0004	0.15989	435	13	103.4	2.5	3097	69	DISC	DISC	76.2
ROC18_11.FIN2	289.3	0.731	0.4691	0.0061	0.06216	0.00038	0.17837	390.2	4.2	388.8	2.3	391	30	388.8	2.3	0.4
ROC18_12.FIN2	19.16	0.07152	2.678	0.066	0.03472	0.00084	0.24695	1317	18	220	5.2	4397	46	DISC	DISC	83.3
ROC18_13.FIN2	408	1.002	0.0829	0.0029	0.0122	0.00015	0.039303	80.7	2.8	78.18	0.94	169	76	78.2	0.9	3.1
ROC18_14.FIN2	598	1.85	0.078	0.0052	0.01189	0.00052	0.17939	76.2	4.9	76.2	3.3	130	150	76.2	3.3	0	Rim
ROC18_14.FIN2	377	1.063	0.1728	0.006	0.02529	0.00053	0.5401	161.6	5.2	161	3.3	169	63	161	3.3	0.4	Core
ROC18_15.FIN2	697	0.907	0.0821	0.0023	0.01238	0.00016	0.19224	80.1	2.1	79.3	1	113	54	79.3	1	1
ROC18_16.FIN2	168.2	1.393	0.0859	0.0053	0.01246	0.00036	0.07151	83.5	5	79.8	2.3	220	130	79.8	2.3	4.4	Rim
ROC18_16.FIN2	414	1.629	0.2046	0.0068	0.02919	0.00039	0.24302	188.7	5.8	185.5	2.5	215	70	185.5	2.5	1.7	Core
ROC18_17.FIN2	299.5	1.463	0.1927	0.0039	0.02847	0.00033	0.23292	178.7	3.3	180.9	2.1	144	45	180.9	2.1	1.2
ROC18_18.FIN2	385	1.01	0.0714	0.0027	0.01051	0.00016	0.10653	70	2.6	67.4	1	160	77	67.4	1	3.7	Rim
ROC18_18.FIN2	222.6	0.871	0.154	0.01	0.0225	0.00043	0.18399	145.6	9	143.4	2.7	170	150	143.4	2.7	1.5	Core
ROC18_19.FIN2	341	1.1	0.0855	0.0028	0.01248	0.00017	0.087612	83.2	2.6	80	1.1	161	70	80	1.1	3.8
ROC18_20.FIN2	331	1.339	0.0875	0.0048	0.01294	0.00048	0.094829	85.1	4.5	82.9	3.1	140	110	82.9	3.1	2.6	Rim
ROC18_20.FIN2	121.2	1.975	0.172	0.01	0.02623	0.00055	0.24736	160.6	8.6	166.9	3.5	90	110	166.9	3.5	3.9	Core
ROC18_21.FIN2	283	1.343	0.1178	0.0079	0.01306	0.00019	0.2681	113	7.1	83.7	1.2	640	110	83.7	1.2	25.9
ROC18_22.FIN2	349	1.632	0.086	0.0087	0.01119	0.00052	0.17753	83.6	8	71.7	3.3	400	190	71.7	3.3	14.2	Rim
ROC18_22.FIN2	210	1.228	0.2008	0.0057	0.02929	0.00037	0.22308	185.6	4.8	186.1	2.3	166	56	186.1	2.3	0.3	Core
ROC18_23.FIN2	336	1.005	0.0812	0.0025	0.01247	0.00016	0.047437	79.2	2.4	79.87	0.99	67	61	79.9	1	0.8
ROC18_24.FIN2	27.32	0.1884	2.193	0.051	0.0291	0.00071	0.45182	1178	16	184.8	4.4	4372	38	DISC	DISC	84.3
ROC18_25.FIN2	275	1.297	0.1015	0.0091	0.01477	0.00076	0.34424	97.9	8.3	94.5	4.8	170	170	94.5	4.8	3.5	Rim
ROC18_25.FIN2	269	1.107	0.1942	0.0073	0.02828	0.00049	0.31588	179.9	6.2	179.8	3.1	183	76	179.8	3.1	0.1	Core
ROC18_26.FIN2	603	1.458	0.0824	0.0043	0.0127	0.00063	0.60749	80.4	4.1	81.3	4	80	180	81.3	4	1.1	Rim
ROC18_26.FIN2	270.2	0.805	0.1729	0.0046	0.02566	0.00027	0.29248	161.7	4	163.3	1.7	138	54	163.3	1.7	1	Core
ROC18_27.FIN2	1450	1.39	0.0872	0.0023	0.0126	0.00023	0.54042	84.9	2.1	80.7	1.4	188	49	80.7	1.4	4.9
ROC18_28.FIN2	25.2	0.0906	2.627	0.074	0.03381	0.00087	0.34572	1300	20	214.2	5.4	4411	46	DISC	DISC	83.5
ROC18_29.FIN2	570.2	1.1	0.0938	0.0025	0.01274	0.00014	0.08926	91	2.3	81.62	0.87	322	55	81.6	0.9	10.3
ROC18_30.FIN2	554	0.926	0.0845	0.0019	0.01272	0.00012	0.048816	82.3	1.8	81.49	0.77	111	48	81.5	0.8	1
ROC18_31.FIN2	415	1.077	0.0416	0.0039	0.00647	0.00017	0.015389	41.4	3.8	41.6	1.1	50	180	41.6	1.1	0.5
ROC18_32.FIN2	195	1.88	0.0757	0.004	0.01171	0.00035	0.30112	73.9	3.8	75	2.2	90	110	75	2.2	1.5	Rim
ROC18_32.FIN2	337.2	1.71	0.1737	0.0074	0.02545	0.00057	0.084907	162.5	6.4	162	3.6	172	93	162	3.6	0.3	Core
ROC18_33.FIN2	6.61	0.1627	7.72	0.42	0.0729	0.0041	0.48643	2180	49	453	24	4910	100	DISC	DISC	79.2
ROC18_34.FIN2	4.78	0.1599	11.24	0.99	0.1077	0.0088	0.98216	2449	71	652	49	4870	65	DISC	DISC	73.4
ROC18_35.FIN2	204.6	2.683	1.616	0.018	0.1593	0.0016	0.43371	975.6	6.9	952.9	9	1028	23	1028	23	7.3
ROC18_36.FIN2	361	1.15	0.1913	0.004	0.02729	0.00028	0.71066	177.5	3.4	173.6	1.8	237	39	173.6	1.8	2.2
ROC18_37.FIN2	271.6	21.8	0.4867	0.0068	0.06408	0.00062	0.45944	402.3	4.6	400.3	3.7	404	29	400.3	3.7	0.5
ROC18_38.FIN2	1050	3.69	0.0852	0.0055	0.01238	0.00071	0.44224	83	5.1	79.3	4.5	190	140	79.3	4.5	4.5	Rim
ROC18_38.FIN2	230.4	2.08	0.198	0.015	0.02768	0.0007	0.659	183	13	176	4.4	250	130	176	4.4	3.8	Core
ROC18_39.FIN2	122	0.871	0.2248	0.0077	0.03194	0.0005	0.16032	205.4	6.4	202.7	3.1	246	76	202.7	3.1	1.3
ROC18_40.FIN2	1490	1.502	0.0803	0.0029	0.01249	0.00017	0.47234	78.4	2.7	80	1.1	46	69	80	1.1	2	Rim
ROC18_40.FIN2	504	1.06	0.193	0.0046	0.02775	0.00027	0.097557	179.1	3.9	176.5	1.7	211	54	176.5	1.7	1.5	Core
ROC18_41.FIN2	690	1.193	0.0591	0.0034	0.005289	8.2e-05	0.28281	58.2	3.2	34.01	0.53	1140	110	DISC	DISC	41.6
ROC18_42.FIN2	182	1.619	0.078	0.011	0.01093	0.00033	0.1553	75.9	9.9	70.1	2.1	270	270	70.1	2.1	7.6	Rim
ROC18_42.FIN2	242	0.914	0.2172	0.0077	0.03043	0.00042	0.33315	199.3	6.5	193.2	2.6	265	74	193.2	2.6	3.1	Core
ROC18_43.FIN2	211	1.29	0.155	0.011	0.02063	0.00073	0.59234	145.7	9.6	131.6	4.6	350	120	131.6	4.6	9.7	Rim
ROC18_43.FIN2	261	1.191	0.55	0.013	0.0611	0.00096	0.61049	444.2	8.4	382.3	5.8	792	43	382.3	5.8	13.9	Core
ROC18_44.FIN2	232	0.945	0.0832	0.0061	0.01228	0.00043	0.094119	81.1	5.7	78.7	2.7	150	150	78.7	2.7	3	Rim
ROC18_44.FIN2	2759	2.174	0.1775	0.002	0.0256	0.00023	0.58506	165.9	1.7	162.9	1.4	206	22	162.9	1.4	1.8	Core
ROC18_45.FIN2	267	1.52	0.0967	0.0075	0.01403	0.00088	0.70198	93.5	7	89.8	5.6	190	120	89.8	5.6	4	Rim
ROC18_45.FIN2	193.7	1.207	0.2087	0.0079	0.03	0.00055	0.078152	192.2	6.6	190.5	3.5	212	86	190.5	3.5	0.9	Core
ROC18_46.FIN2	441	0.991	0.0809	0.0045	0.01273	0.00032	0.49391	78.9	4.2	81.5	2	50	100	81.5	2	3.3
ROC18_47.FIN2	178	6.8	1.686	0.027	0.1639	0.0021	0.32515	1001	10	978	12	1050	31	1050	31	6.9
ROC18_48.FIN2	823	2.65	0.2062	0.0045	0.02917	0.00048	0.65725	190.2	3.8	185.3	3	240	36	185.3	3	2.6
ROC18_49.FIN2	160	1.591	0.085	0.011	0.01286	0.00044	0.059627	82.7	9.6	82.4	2.8	70	180	82.4	2.8	0.4	Rim
ROC18_49.FIN2	295	2.323	0.1743	0.0075	0.02557	0.00062	0.374	162.9	6.5	162.8	3.9	171	85	162.8	3.9	0.1	Core
ROC18_50.FIN2	371	2.233	4.518	0.037	0.3032	0.0026	0.55023	1733.4	6.8	1707	13	1764	15	1764	15	3.2
ROC18_51.FIN2	310	1.067	0.0814	0.0055	0.01185	0.0003	0.57559	79.3	5.1	75.9	1.9	180	120	75.9	1.9	4.3	Rim
ROC18_51.FIN2	421	2.776	0.401	0.017	0.054	0.0026	0.85225	341	13	339	16	380	47	339	16	0.6	Core
ROC18_52.FIN2	226	1.072	0.0835	0.0059	0.01256	0.00042	0.09664	81.3	5.6	80.5	2.7	120	150	80.5	2.7	1	Rim
ROC18_52.FIN2	159.2	1.285	0.1734	0.0068	0.0259	0.0005	0.33103	162.1	5.9	164.8	3.2	129	77	164.8	3.2	1.7	Core
ROC18_53.FIN2	890	0.788	0.0791	0.0014	0.01189	0.00012	0.20688	77.2	1.3	76.21	0.77	119	40	76.2	0.8	1.3
ROC18_54.FIN2	26.63	0.13	0.536	0.023	0.01528	0.00049	0.23887	432	15	97.7	3.1	3216	88	DISC	DISC	77.4
ROC18_55.FIN2	196	1.483	0.0839	0.0052	0.01223	0.00034	0.031254	81.6	4.8	78.4	2.2	180	130	78.4	2.2	3.9	Rim
ROC18_55.FIN2	711	4.97	0.2759	0.0078	0.0392	0.001	0.68506	247.2	6.2	248	6.4	239	47	248	6.4	0.3	Core
ROC18_56.FIN2	401.3	0.81	0.0821	0.0027	0.0123	0.00018	0.38667	80.1	2.6	78.8	1.2	141	64	78.8	1.2	1.6
ROC18_57.FIN2	217.6	0.959	0.2097	0.0067	0.02683	0.00042	0.34921	193	5.6	170.7	2.7	450	67	170.7	2.7	11.6
ROC18_58.FIN2	236	3.76	0.1163	0.0072	0.01309	0.00021	0.33499	110.9	6.5	83.8	1.3	630	120	83.8	1.3	24.4
ROC18_59.FIN2	233	1.263	0.0882	0.0034	0.0124	0.00019	0.081925	85.6	3.2	79.5	1.2	242	76	79.5	1.2	7.1
ROC18_60.FIN2	4640	2.847	0.0872	0.0026	0.01276	0.00041	0.77881	84.9	2.4	81.7	2.6	175	45	81.7	2.6	3.8	Rim
ROC18_60.FIN2	266	2.066	0.2012	0.0079	0.02851	0.0006	0.01789	186	6.7	181.2	3.8	246	95	181.2	3.8	2.6	Core
ROC18_61.FIN2	150.6	1.297	2.598	0.043	0.2152	0.0029	0.57471	1297	12	1256	16	1367	27	1367	27	8.1
ROC18_62.FIN2	1000	1.353	0.1698	0.0057	0.02482	0.00078	0.82441	158.8	5	158	4.9	182	38	158	4.9	0.5
ROC18_63.FIN2	207	0.528	0.3776	0.0077	0.05061	0.00054	0.22943	325.4	5.8	318.3	3.3	374	47	318.3	3.3	2.2
ROC18_64.FIN2	390	1.427	0.087	0.0059	0.01294	0.00045	0.29774	84.6	5.5	82.9	2.9	140	130	82.9	2.9	2	Rim
ROC18_64.FIN2	353	1.138	0.1923	0.0052	0.02839	0.00049	0.3855	178.4	4.4	180.5	3.1	167	57	180.5	3.1	1.2	Core
ROC18_65.FIN2	153.1	1.666	0.078	0.011	0.01285	0.00054	0.31319	76	10	82.3	3.4	40	300	82.3	3.4	8.3	Rim
ROC18_65.FIN2	352	1.026	0.1909	0.0043	0.02784	0.00034	0.21238	177.3	3.7	177	2.1	182	51	177	2.1	0.2	Core
ROC18_66.FIN2	1220	1.107	0.0913	0.0042	0.01319	0.0003	0.1621	88.6	3.9	84.5	1.9	197	98	84.5	1.9	4.6	Rim
ROC18_66.FIN2	420	1.244	0.1966	0.0058	0.02812	0.00048	0.43981	182	4.9	178.7	3	214	58	178.7	3	1.8	Core
ROC18_67.FIN2	5.66	0.1813	8.56	0.44	0.0843	0.0042	0.58337	2260	44	520	25	4843	63	DISC	DISC	77
ROC18_68.FIN2	420	1.32	0.1927	0.0041	0.02819	0.00039	0.61766	178.7	3.5	179.2	2.4	181	37	179.2	2.4	0.3
ROC18_69.FIN2	206	1.08	0.0882	0.0089	0.01324	0.00051	0.19147	85.6	8.3	84.8	3.2	120	180	84.8	3.2	0.9	Rim
ROC18_69.FIN2	291	1.271	0.1995	0.0091	0.02837	0.00048	0.16218	184.4	7.8	180.3	3	234	99	180.3	3	2.2	Core
ROC18_70.FIN2	221	1.419	0.0822	0.0038	0.01217	0.00026	0.22056	80.1	3.6	78	1.6	163	97	78	1.6	2.6
ROC18_71.FIN2	400	1.31	0.094	0.013	0.0146	0.0014	0.61417	91	12	93.3	8.9	50	220	93.3	8.9	2.5	Rim
ROC18_71.FIN2	252	1.038	0.1869	0.0062	0.02705	0.00055	0.44078	174.7	5.1	172	3.5	196	66	172	3.5	1.5	Core
ROC18_72.FIN2	227.6	1.284	0.0932	0.0069	0.01298	0.00047	0.069359	90.3	6.3	83.1	3	260	150	83.1	3	8	Rim
ROC18_72.FIN2	395	6.21	0.1693	0.0047	0.02476	0.00033	0.23217	158.7	4.1	157.6	2.1	175	60	157.6	2.1	0.7	Core
ROC18_73.FIN2	487	29.1	0.1219	0.0062	0.01765	0.0009	0.1442	116.7	5.6	112.8	5.7	199	81	112.8	5.7	3.3	Rim
ROC18_73.FIN2	364	0.967	0.2044	0.0066	0.03004	0.00042	0.13917	188.6	5.5	190.8	2.6	163	69	190.8	2.6	1.2	Core
ROC18_74.FIN2	254	1.382	0.0802	0.0056	0.01256	0.00045	0.32748	78.2	5.2	80.5	2.8	110	140	80.5	2.8	2.9
ROC18_75.FIN2	219	1.323	0.0665	0.0099	0.0111	0.00057	0.033625	65.3	9.4	71.1	3.6	-70	290	71.1	3.6	8.9	Rim
ROC18_75.FIN2	250	0.957	0.1991	0.0058	0.02894	0.00036	0.10054	184.1	4.9	183.9	2.3	188	63	183.9	2.3	0.1	Core
ROC18_76.FIN2	241.7	0.802	0.0835	0.0041	0.01252	0.00024	0.035394	81.3	3.8	80.2	1.5	130	100	80.2	1.5	1.4
ROC18_77.FIN2	17.03	0.084	2.594	0.074	0.0323	0.001	0.34083	1291	20	205.1	6.3	4479	51	DISC	DISC	84.1
ROC18_78.FIN2	310	1.166	0.0841	0.0054	0.01181	0.00033	0.18954	81.8	5	75.7	2.1	240	130	75.7	2.1	7.5	Rim
ROC18_78.FIN2	463	1.004	0.1946	0.0058	0.02867	0.00048	0.46293	180.3	4.9	182.2	3	171	59	182.2	3	1.1	Core
ROC18_79.FIN2	205	1.637	0.0823	0.0032	0.01315	0.0002	0.16574	80.1	3	84.2	1.3	8	74	84.2	1.3	5.1
ROC18_80.FIN2	36.1	0.0704	2.386	0.089	0.03119	0.00098	0.71624	1238	27	197.9	6.1	4401	41	DISC	DISC	84
ROC18_81.FIN2	207	1.76	0.0822	0.008	0.012	0.00043	0.041029	80	7.4	76.9	2.7	160	190	76.9	2.7	3.9	Rim
ROC18_81.FIN2	245	1.1	0.1769	0.0064	0.02578	0.00046	0.44615	165.1	5.6	164.1	2.9	191	63	164.1	2.9	0.6	Core
ROC18_82.FIN2	250	0.89	0.0739	0.0054	0.01065	0.00033	0.072176	72.3	5.1	68.3	2.1	210	160	68.3	2.1	5.5	Rim
ROC18_82.FIN2	1650	1.969	0.1895	0.0074	0.02652	0.00076	0.82818	176	6.3	168.7	4.8	257	50	168.7	4.8	4.1	Core
ROC18_83.FIN2	160.9	0.778	13.14	0.12	0.5152	0.0046	0.71688	2688.7	8.4	2678	19	2697	12	2697	12	0.7
ROC18_84.FIN2	412	1.634	0.1728	0.0041	0.02581	0.00044	0.72082	162.1	3.4	164.2	2.8	148	39	164.2	2.8	1.3
ROC18_85.FIN2	122.6	1.083	0.0845	0.0039	0.0125	0.00021	0.2118	82.1	3.7	80	1.3	132	86	80	1.3	2.6
ROC18_86.FIN2	332	1.959	5.785	0.088	0.3304	0.0045	0.93391	1944	13	1839	22	2066.2	9.6	2066.2	9.6	11
ROC18_87.FIN2	207	1.7	0.0963	0.0057	0.0141	0.00057	0.59608	92.8	5.2	90.2	3.6	155	92	90.2	3.6	2.8
ROC18_88.FIN2	348	1.118	0.086	0.003	0.01256	0.00023	0.40589	83.7	2.8	80.5	1.5	172	65	80.5	1.5	3.8
ROC18_89.FIN2	418	1.401	0.1629	0.0052	0.02329	0.00065	0.75761	152.8	4.6	148.4	4.1	224	45	148.4	4.1	2.9
ROC18_90.FIN2	333	0.959	0.1954	0.0043	0.02828	0.00027	0.28629	181	3.6	179.8	1.7	194	42	179.8	1.7	0.7
ROC18_91.FIN2	167.5	1.507	0.093	0.012	0.01451	0.00072	0.37973	90	11	92.8	4.6	30	230	92.8	4.6	3.1	Rim
ROC18_91.FIN2	362	1.564	0.1928	0.0045	0.02821	0.00044	0.17592	178.8	3.8	179.3	2.7	177	54	179.3	2.7	0.3	Core
ROC18_92.FIN2	593	1.407	0.0804	0.0017	0.01224	0.00012	0.18634	78.5	1.6	78.44	0.79	93	46	78.4	0.8	0.1
ROC18_93.FIN2	408	1.031	0.0843	0.0023	0.01243	0.00022	0.29368	82	2.2	79.7	1.4	160	56	79.7	1.4	2.8
ROC18_94.FIN2	400	1.75	0.0911	0.0076	0.01344	0.00061	0.257	88.4	7.1	86	3.9	210	190	86	3.9	2.7	Rim
ROC18_94.FIN2	217.2	1.105	0.2102	0.0064	0.03038	0.00034	0.15418	193.4	5.4	192.9	2.1	197	65	192.9	2.1	0.3	Core
ROC18_95.FIN2	150	0.97	0.0797	0.0071	0.01241	0.00062	0.52633	77.8	6.6	79.5	3.9	30	150	79.5	3.9	2.2
ROC18_96.FIN2	205	1.153	0.076	0.012	0.01091	0.0004	0.071358	74	12	70	2.6	210	310	70	2.6	5.4	Rim
ROC18_96.FIN2	521	1.84	0.1924	0.0035	0.02777	0.00034	0.14498	178.5	3	176.5	2.2	223	50	176.5	2.2	1.1	Core
ROC18_97.FIN2	587	1.153	0.0839	0.0035	0.0121	0.00026	0.25125	81.7	3.3	77.5	1.6	214	88	77.5	1.6	5.1	Rim
ROC18_97.FIN2	283.1	1.151	0.4	0.017	0.0431	0.0011	0.33609	341	12	271.8	6.5	838	93	271.8	6.5	20.3	Core
ROC18_98.FIN2	259	0.999	0.088	0.008	0.01287	0.00036	0.057134	85.5	7.5	82.4	2.3	160	190	82.4	2.3	3.6	Rim
ROC18_98.FIN2	312.7	0.834	0.1434	0.0055	0.02145	0.00052	0.49339	136	4.9	136.8	3.3	127	67	136.8	3.3	0.6	Core
ROC18_99.FIN2	238	1.417	0.105	0.003	0.01571	0.0002	0.1566	101.2	2.8	100.5	1.3	126	59	100.5	1.3	0.7
ROC18_100.FIN2	331.5	0.6735	0.084	0.0033	0.01271	0.00017	0.21734	81.8	3	81.4	1.1	92	83	81.4	1.1	0.5
ROC18_101.FIN2	289	1.079	0.097	0.0087	0.01415	0.00066	0.68199	93.8	8	90.5	4.2	160	130	90.5	4.2	3.5	Rim
ROC18_101.FIN2	285	1.143	0.1869	0.0048	0.02777	0.0003	0.27027	173.8	4.1	176.6	1.9	148	54	176.6	1.9	1.6	Core
ROC18_102.FIN2	276	0.917	0.0791	0.003	0.01172	0.00021	0.26167	77.2	2.8	75.1	1.3	155	74	75.1	1.3	2.7
ROC18_103.FIN2	330	2.94	3.365	0.074	0.2586	0.0044	0.90714	1490	18	1481	23	1509	18	1509	18	1.9
ROC18_104.FIN2	248	1.272	0.0797	0.0027	0.01255	0.00017	0.039985	77.8	2.6	80.4	1.1	28	66	80.4	1.1	3.3
ROC18_105.FIN2	230	1.191	0.0845	0.0028	0.0127	0.00015	0.20776	82.2	2.6	81.33	0.95	91	63	81.3	1	1.1
ROC18_106.FIN2	261	1.054	0.081	0.0046	0.01229	0.0003	0.293	78.9	4.3	78.8	1.9	90	100	78.8	1.9	0.1	Rim
ROC18_106.FIN2	321.4	0.742	0.21	0.011	0.0295	0.00048	0.17933	193.2	9	187.4	3	250	120	187.4	3	3	Core
ROC18_107.FIN2	93.7	1.256	1.185	0.063	0.1112	0.0042	0.75927	790	29	679	25	1110	66	679	25	14.1	Rim
ROC18_107.FIN2	42.78	1.355	1.697	0.045	0.1683	0.0023	0.3549	1004	17	1002	13	1000	52	1000	52	0.2	Core
ROC18_108.FIN2	282	1.46	0.0703	0.0063	0.01065	0.00036	0.23921	68.9	5.9	68.3	2.3	100	170	68.3	2.3	0.9	Rim
ROC18_108.FIN2	232.9	1.092	0.1739	0.0059	0.02567	0.00034	0.21589	162.5	5.1	163.4	2.1	142	68	163.4	2.1	0.6	Core
ROC18_109.FIN2	283	1.164	0.0821	0.0026	0.01227	0.00015	0.18234	80	2.5	78.63	0.97	116	65	78.6	1	1.7
ROC18_110.FIN2	252	1.462	0.0839	0.0052	0.01273	0.00041	0.38285	81.7	4.9	81.5	2.6	80	110	81.5	2.6	0.2	Rim
ROC18_110.FIN2	590	1.008	0.1311	0.0041	0.02001	0.0004	0.40637	125	3.7	127.7	2.5	86	60	127.7	2.5	2.2	Core
ROC18_111.FIN2	241	1.047	0.1283	0.0091	0.01311	0.00032	0.27798	122.2	8.2	84	2	880	150	DISC	DISC	31.3	Rim
ROC18_111.FIN2	183.1	1	0.1973	0.0068	0.02788	0.00042	0.19004	182.5	5.8	177.3	2.6	246	73	177.3	2.6	2.8	Core
ROC18_112.FIN2	380	1.219	0.1957	0.0047	0.02819	0.00047	0.2622	181.2	4	179.2	2.9	206	52	179.2	2.9	1.1
ROC18_113.FIN2	290	1.288	0.1899	0.0041	0.02789	0.00035	0.36009	176.3	3.5	177.3	2.2	173	48	177.3	2.2	0.6
ROC18_114.FIN2	408	1.082	0.0857	0.0042	0.01281	0.0003	0.25276	83.3	3.9	82.1	1.9	111	95	82.1	1.9	1.4
ROC18_115.FIN2	203	1.049	0.079	0.011	0.01187	0.00052	0.26701	77	11	76	3.3	50	270	76	3.3	1.3	Rim
ROC18_115.FIN2	340.6	2.52	0.1701	0.005	0.02428	0.00035	0.050811	159.4	4.4	154.7	2.2	227	69	154.7	2.2	2.9	Core
ROC18_116.FIN2	4.67	0.1633	9.77	0.43	0.0956	0.0044	0.7672	2389	41	587	26	4866	66	DISC	DISC	75.4
ROC18_117.FIN2	348	1.218	0.085	0.0031	0.01228	0.00019	0.32123	83.1	3	78.7	1.2	220	73	78.7	1.2	5.3
ROC18_118.FIN2	156.7	1.46	0.1656	0.0046	0.02394	0.00028	0.015903	155.3	4	152.5	1.8	200	60	152.5	1.8	1.8
ROC18_120.FIN2	326	1.102	0.0856	0.0044	0.01228	0.00031	0.58078	83.2	4.1	78.7	2	209	85	78.7	2	5.4
